# Supplementary material for: Patient Perspectives on Blended Internet-Based and Face-to-Face Cognitive Behavioral Therapy for Alcohol Use Disorder: Qualitative Study
Source: PubMed Central journal article supplement (PMC11541155; doi:10.2196/47083), 2024-10-23
Supplement: jmir_v26i1e47083_app1.pdf [file jmir_v26i1e47083_app1.pdf]

| <b>Appendix 1: Interview guide for patients who have been using blended internet-based treatment for alcohol use disorder.</b> |                                                                                                                                                                                                                                                                                                                                                                                                                                                                                                                                                                                                                                                                                                                                                                                                                                                                                                                                                                                                                                                                                                                                                                                                                                                                                                                         |
|--------------------------------------------------------------------------------------------------------------------------------|-------------------------------------------------------------------------------------------------------------------------------------------------------------------------------------------------------------------------------------------------------------------------------------------------------------------------------------------------------------------------------------------------------------------------------------------------------------------------------------------------------------------------------------------------------------------------------------------------------------------------------------------------------------------------------------------------------------------------------------------------------------------------------------------------------------------------------------------------------------------------------------------------------------------------------------------------------------------------------------------------------------------------------------------------------------------------------------------------------------------------------------------------------------------------------------------------------------------------------------------------------------------------------------------------------------------------|
| <b>Introductory questions:</b>                                                                                                 | <p><i>Thank you for participating in this interview. If you consent, I would like to record it. The interview will be about how you have experienced combining conversations by physical presence with internet-based alcohol treatment. First, I will pose some introductory questions, and then some questions about your reasons to choose internet-based treatment, and some questions about how it has been to use it. I will finish of with some concluding questions. I will start asking questions, you are welcome to explain and describe in the direction the experiences and perceptions occur to you. At first, the introductory questions.</i></p> <ul style="list-style-type: none"> <li>• Do you live together with someone? If yes, who?</li> <li>• Do you have an education and occupation? If yes, what?</li> <li>• Will you describe a normal every day for you?</li> <li>• Do you use a computer/iPad in your everyday life (except for internet treatment)? If yes, how often?</li> <li>• Do you feel safe using the internet under treatment?</li> <li>• Do you suffer from any diseases?</li> <li>• What were your reasons for choosing alcohol treatment (Do they explain how long, how much and how often they have been drinking – and their motivation searching for treatment)?</li> </ul> |
| <b>Questions about choosing combined treatment course:</b>                                                                     | <p><i>Is there anything else you would like to tell about your background? Otherwise, I will move to the questions about your reasons for choosing a combination of conversations by physical presence and internet-based alcohol treatment as your care trajectory.</i></p> <ul style="list-style-type: none"> <li>• What considerations did you have when you had to decide whether you would like only treatment by physical presence or you would like to combine the course with internet-based treatment?</li> <li>• How have you experienced having the opportunity to choose between physical presence and the combination with interned-based treatment?</li> <li>• Would you want to start treatment if there was no opportunity for the internet-based/combined course?</li> </ul>                                                                                                                                                                                                                                                                                                                                                                                                                                                                                                                           |
| <b>Questions about experiences with using the program:</b>                                                                     | <p><i>Is there anything else you would like to tell about reasons for choosing the combined care trajectory? Otherwise, I will move to the questions about your experiences with using internet-based treatment. First, some questions about the program specific.</i></p> <ul style="list-style-type: none"> <li>• How have you experienced using the internet-based treatment program?</li> <li>• What is your impression of the material in the program (reading material, tasks, diary, and registrations)?</li> <li>• How has it been to execute the tasks in the program?</li> </ul>                                                                                                                                                                                                                                                                                                                                                                                                                                                                                                                                                                                                                                                                                                                              |

|                                                                            |                                                                                                                                                                                                                                                                                                                                                                                                                                                                                                                                                                                     |
|----------------------------------------------------------------------------|-------------------------------------------------------------------------------------------------------------------------------------------------------------------------------------------------------------------------------------------------------------------------------------------------------------------------------------------------------------------------------------------------------------------------------------------------------------------------------------------------------------------------------------------------------------------------------------|
|                                                                            | <ul style="list-style-type: none"> <li>• How have you experienced getting feedback in writing from your therapist?</li> <li>• Have you experienced any challenges when using the program? If yes, which?</li> <li>• Do you have any ideas as to how the program can improve?</li> </ul>                                                                                                                                                                                                                                                                                             |
| <p><b>Questions about receiving combined/internet-based treatment:</b></p> | <p><i>Then some questions about receiving the combined/internet-based treatment in general.</i></p> <ul style="list-style-type: none"> <li>• Does the internet-based treatment support your everyday life? How?</li> <li>• Have you experienced the combination with internet-based treatment can do something the physical presence alone can't? If yes, what and how?</li> <li>• Have you experienced any challenges because your treatment was combined or internet-based? If yes, which?</li> <li>• Is there anything you have been missing in your care trajectory?</li> </ul> |
| <p><b>Concluding questions:</b></p>                                        | <p><i>Is there anything else you would like to say about your experiences with using the program? Otherwise, I will ask:</i></p> <ul style="list-style-type: none"> <li>• Is there more you would like to tell?</li> <li>• Do you have any questions you would like to ask?</li> </ul> <p><i>Thank you a lot for participating in this interview and share your experiences. The interview will be anonymized and transcribed. Then the interviews will be analyzed and disseminated in an article.</i></p>                                                                         |
